# Supplementary material for: Inhibition of Nuclear Factor of Activated T-Cells (NFAT) Suppresses Accelerated Atherosclerosis in Diabetic Mice
Source: PubMed Central journal article supplement (PMC3670844; doi:10.1371/journal.pone.0065020), 2013-06-03
Supplement: pone.0065020.s006.pdf [file pone.0065020.s006.pdf]

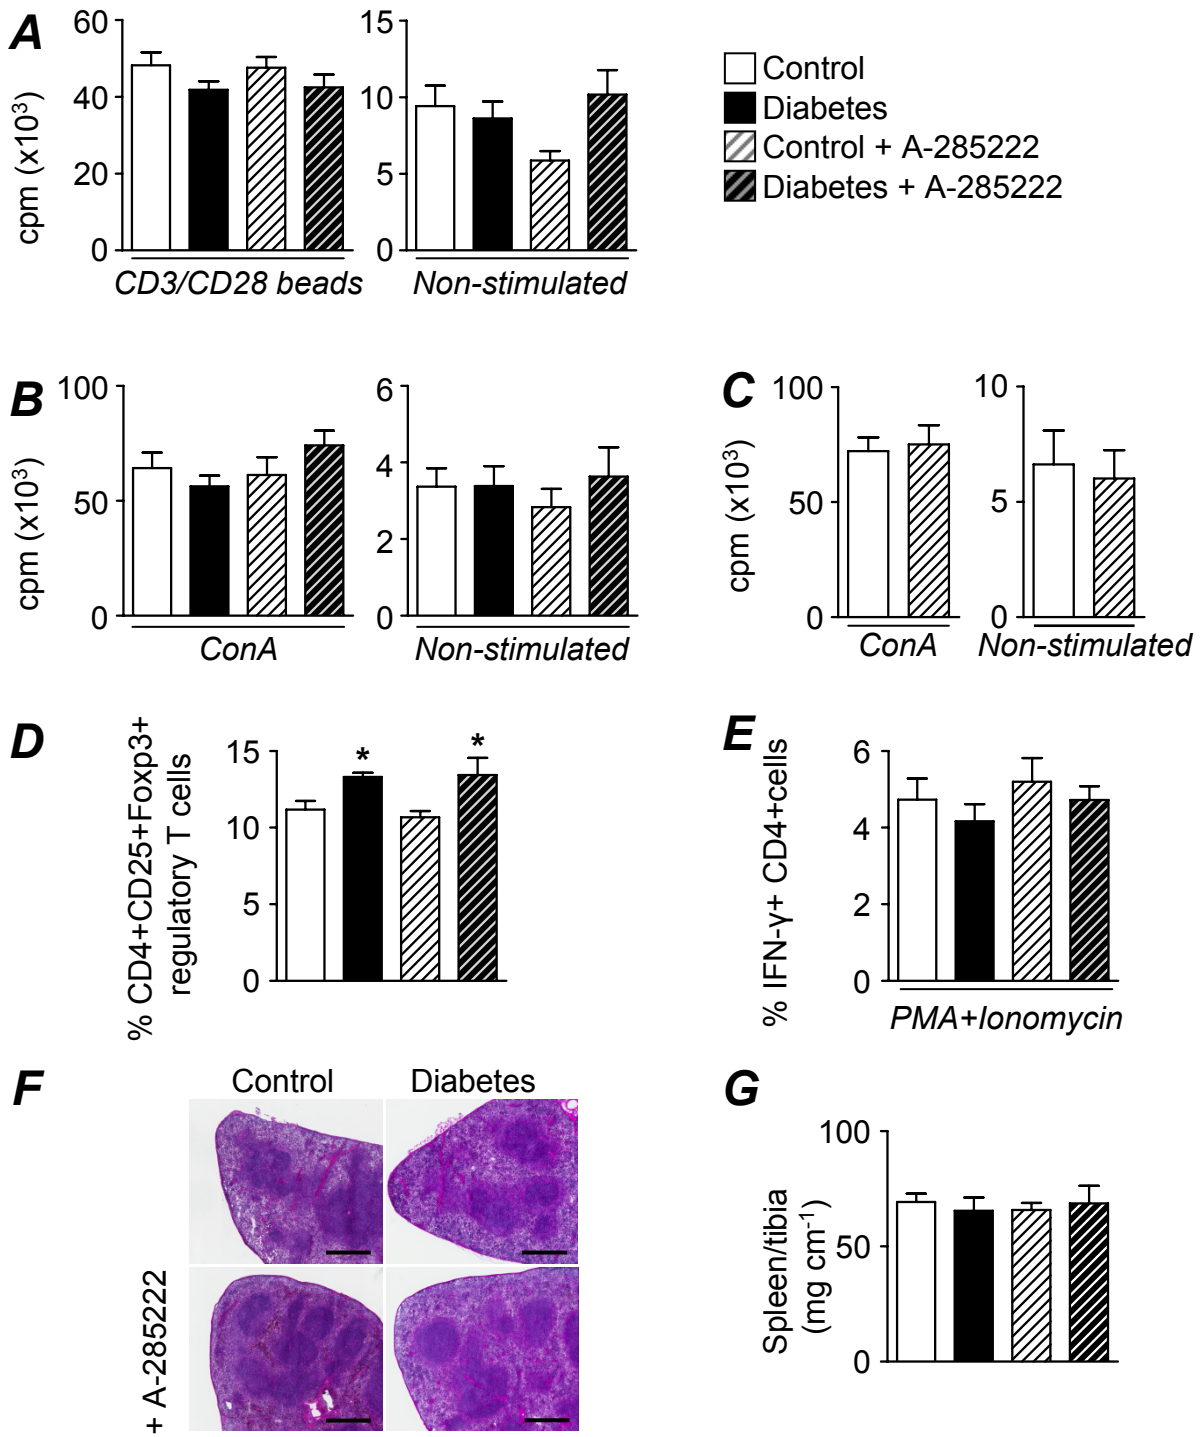

**Figure S6**
